# Supplementary material for: Fe-based double perovskite with Zn doping for enhanced electrochemical performance as intermediate-temperature solid oxide fuel cell cathode material
Source: Royal Society of Chemistry journal article supplement (doi:10.1039/d3ra04991d), 2023-01-01
Supplement: d3ra04991d1.pdf [file d3ra04991d1.pdf]

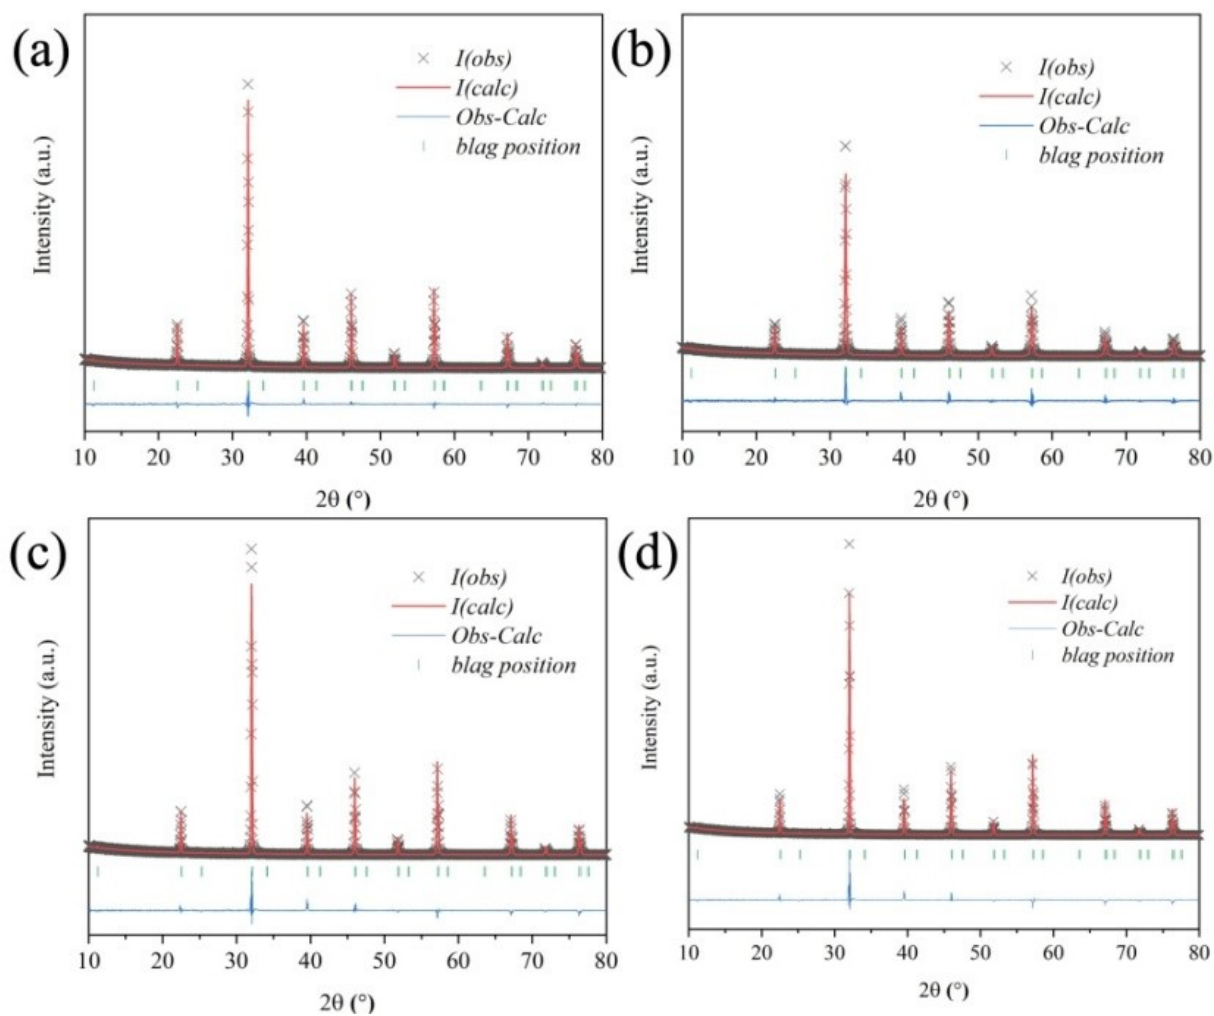

Fig. S1 (a~d) Rietveld refinement patterns of LBFZ<sub>x</sub> samples (x=0, 0.05, 0.15 and 0.2)

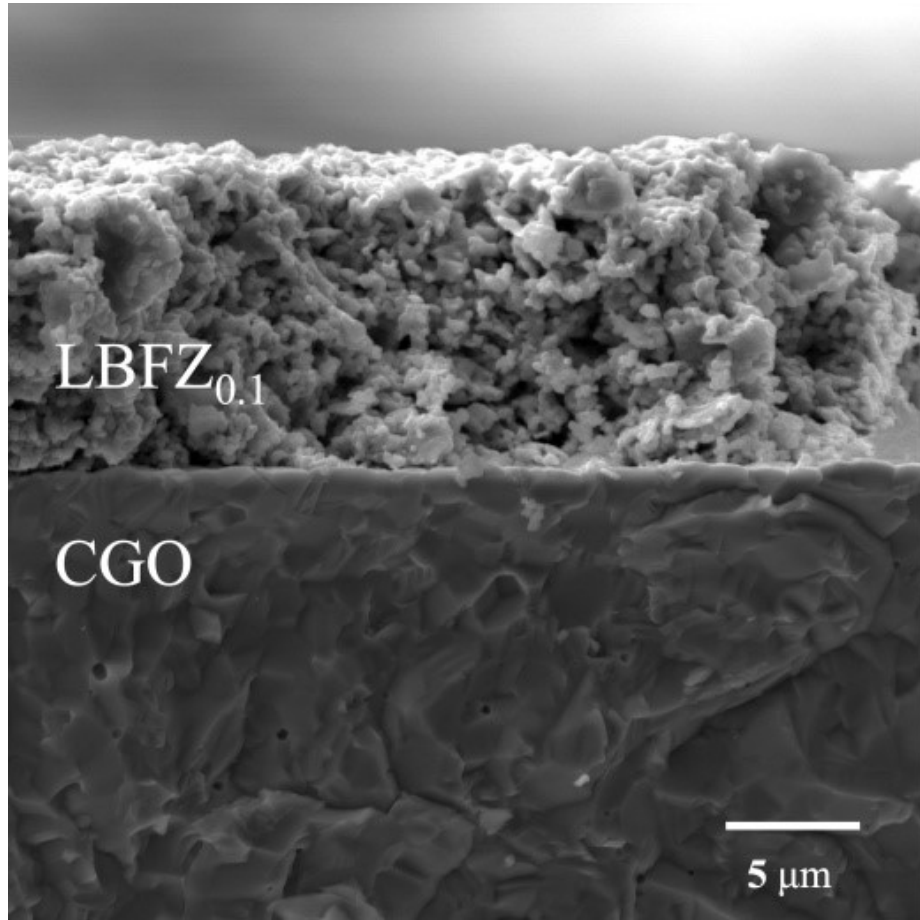

Fig.S2 SEM image of  $\text{LBFZ}_{0.1}|\text{CGO}$  cross-section

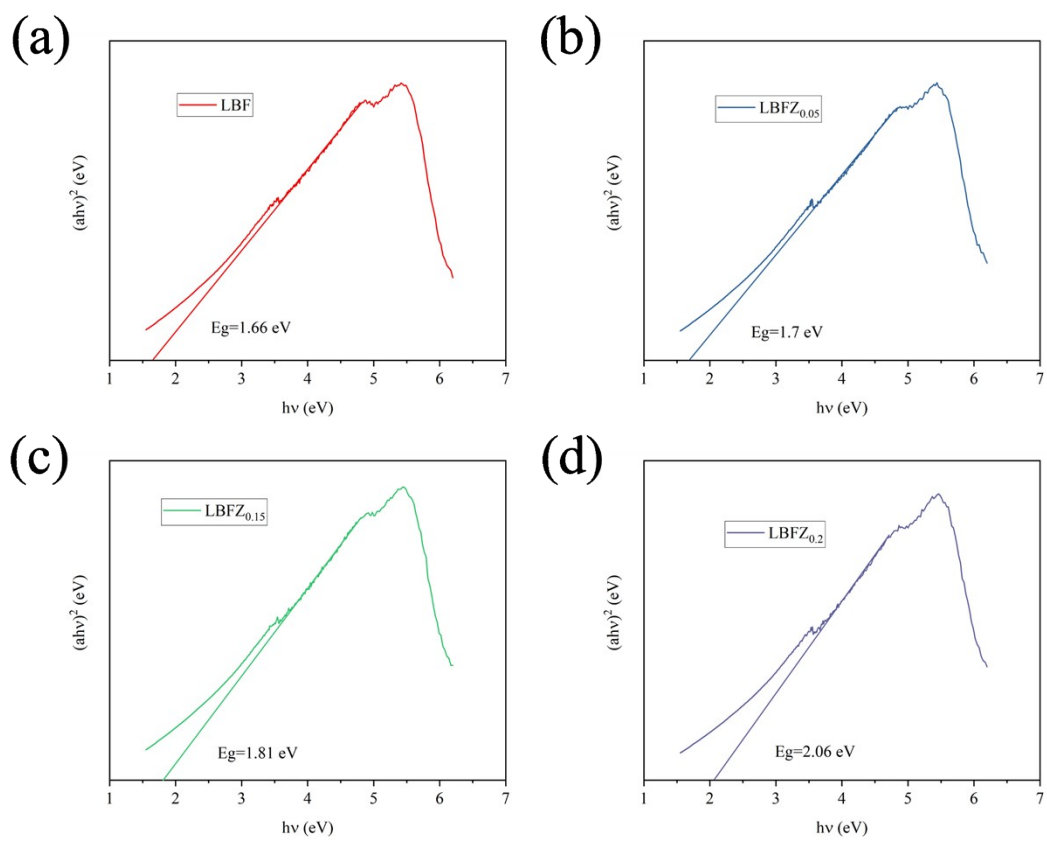

Figure S3 Tauc curves for LBFZ<sub>x</sub> (x=0, 0.05, 0.15 and 0.2)

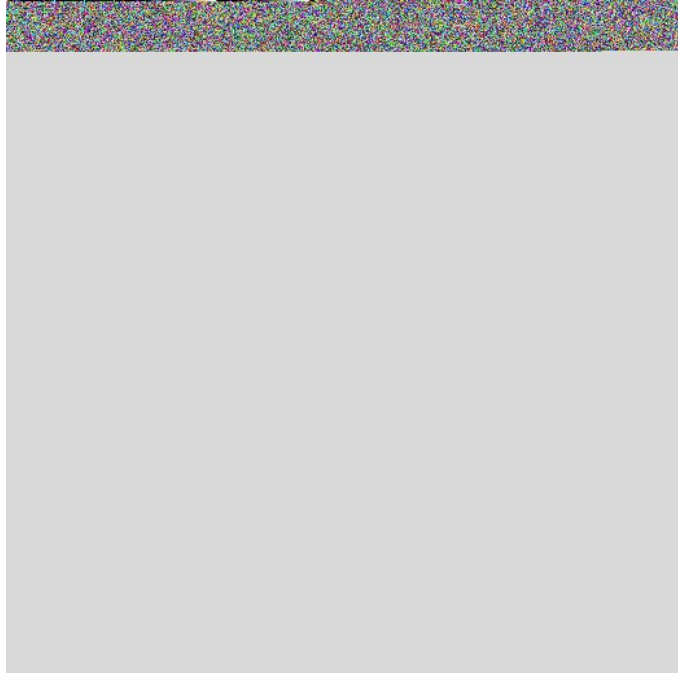

Figure S4 SEM image of LBFZ<sub>0.1</sub>|CGO cross-section

**Table S1 Rietveld refinement results of LBFZ<sub>x</sub>**

| Sample      |                    | LBF             | LBFZ <sub>0.5</sub> | LBFZ <sub>0.1</sub> | LBFZ <sub>0.15</sub> | LBFZ <sub>0.2</sub> |
|-------------|--------------------|-----------------|---------------------|---------------------|----------------------|---------------------|
| Space group |                    | P4/mmm          | P4/mmm              | P4/mmm              | P4/mmm               | P4/mmm              |
|             | a=b(Å)             | 3.94095         | 3.94105             | 3.94124             | 3.94213              | 3.94353             |
| Lattice     | c(Å)               | 7.87891         | 7.87970             | 7.88047             | 7.88209              | 7.88340             |
| parameters  | V(Å <sup>3</sup> ) | 122.3681        | 122.3866            | 122.4104            | 122.4908             | 122.5982            |
|             | La,0,0,0.5         | La,0,0,0.5      | La,0,0,0.5          | La,0,0,0.5          | La,0,0,0.5           | La,0,0,0.5          |
|             | Occupancy=1        | Occupancy=1     | Occupancy=1         | Occupancy=1         | Occupancy=1          | Occupancy=1         |
|             | Ba,0,0,0           | Ba,0,0,0        | Ba,0,0,0            | Ba,0,0,0            | Ba,0,0,0             | Ba,0,0,0            |
|             | Occupancy=1        | Occupancy=1     | Occupancy=1         | Occupancy=1         | Occupancy=1          | Occupancy=1         |
|             | Fe,0.5,0.5,0.25    | Fe,0.5,0.5,0.25 | Fe,0.5,0.5,0.25     | Fe,0.5,0.5,0.25     | Fe,0.5,0.5,0.25      | Fe,0.5,0.5,0.25     |
| Atom        | Occupancy=1        | Occupancy=0.95  | Occupancy=0.9       | Occupancy=0.85      | Occupancy=0.8        | Occupancy=0.8       |
| position    |                    | Zn,0.5,0.5,0.25 | Zn,0.5,0.5,0.25     | Zn,0.5,0.5,0.25     | Zn,0.5,0.5,0.25      | Zn,0.5,0.5,0.25     |
|             |                    | Occupancy=0.05  | Occupancy=0.1       | Occupancy=0.15      | Occupancy=0.2        | Occupancy=0.2       |
|             | O1,0.5,0.5,0.5     | O1,0.5,0.5,0.5  | O1,0.5,0.5,0.5      | O1,0.5,0.5,0.5      | O1,0.5,0.5,0.5       | O1,0.5,0.5,0.5      |
|             | Occupancy=1        | Occupancy=1     | Occupancy=1         | Occupancy=1         | Occupancy=1          | Occupancy=1         |
|             | O2,0,0.5,0.25      | O2,0,0.5,0.25   | O2,0,0.5,0.25       | O2,0,0.5,0.25       | O2,0,0.5,0.25        | O2,0,0.5,0.25       |
|             | Occupancy=1        | Occupancy=1     | Occupancy=1         | Occupancy=1         | Occupancy=1          | Occupancy=1         |
|             | O3,0.5,0.5,0       | O3,0.5,0.5,0    | O3,0.5,0.5,0        | O3,0.5,0.5,0        | O3,0.5,0.5,0         | O3,0.5,0.5,0        |
|             | Occupancy=1        | Occupancy=1     | Occupancy=1         | Occupancy=1         | Occupancy=1          | Occupancy=1         |
| Refinement  | R <sub>p</sub>     | 7.74%           | 4.45%               | 4.09%               | 4.46%                | 5.06%               |
| Parameters  | R <sub>wp</sub>    | 12.6%           | 10.07%              | 9.65%               | 11.52%               | 11.57%              |
|             | χ <sup>2</sup>     | 2.679           | 1.956               | 1.800               | 2.24                 | 2.169               |

**Table S2 Oxygen content of LBFZ<sub>x</sub>, oxygen vacancy, average valence of Fe<sup>n+</sup>**

| LBFZ <sub>x</sub> | 5+ $\delta$ | Oxygen vacancy | Fe <sup>n+</sup> average state |
|-------------------|-------------|----------------|--------------------------------|
| x=0.00            | 5.822       | 0.178          | 3.322                          |
| x=0.05            | 5.817       | 0.183          | 3.351                          |
| x=0.10            | 5.80        | 0.20           | 3.366                          |
| x=0.15            | 5.796       | 0.204          | 3.401                          |
| x=0.20            | 5.793       | 0.207          | 3.437                          |

**Table S3 XPS percentage values for Fe and O elements**

| Sample | Fe <sup>3+</sup> (%) | Fe <sup>4+</sup> (%) | (O <sub>adsorbed</sub> +O <sub>vacancy</sub> ) (%) | (O <sub>adsorbed</sub> +O <sub>vacancy</sub> ) /O <sub>Lattice</sub> |
|--------|----------------------|----------------------|----------------------------------------------------|----------------------------------------------------------------------|
| x=0.00 | 53.9                 | 46.1                 | 61.21                                              | 2.2797                                                               |
| x=0.05 | 51.92                | 48.08                | 61.97                                              | 2.3167                                                               |
| x=0.10 | 49.76                | 50.24                | 64.11                                              | 2.4358                                                               |
| x=0.15 | 48.99                | 51.01                | 65.18                                              | 2.5293                                                               |
| x=0.20 | 47.12                | 52.88                | 65.32                                              | 2.5506                                                               |

**Table S4 Average thermal expansion coefficient of LBFZ<sub>x</sub> (K<sup>-1</sup>)**

| Sample                                                     | 30~300 °C             | 300~750 °C            | 30~750 °C             |
|------------------------------------------------------------|-----------------------|-----------------------|-----------------------|
| LaBaFeO <sub>5+δ</sub>                                     | 6.45×10 <sup>-6</sup> | 21.2×10 <sup>-6</sup> | 13.2×10 <sup>-6</sup> |
| LaBaFe <sub>1.95</sub> Zn <sub>0.5</sub> O <sub>5+δ</sub>  | 6.22×10 <sup>-6</sup> | 20.6×10 <sup>-6</sup> | 12.9×10 <sup>-6</sup> |
| LaBaFe <sub>1.9</sub> Zn <sub>0.1</sub> O <sub>5+δ</sub>   | 6.11×10 <sup>-6</sup> | 18.9×10 <sup>-6</sup> | 11.8×10 <sup>-6</sup> |
| LaBaFe <sub>1.85</sub> Zn <sub>0.15</sub> O <sub>5+δ</sub> | 4.74×10 <sup>-6</sup> | 18.8×10 <sup>-6</sup> | 11.7×10 <sup>-6</sup> |
| LaBaFe <sub>1.8</sub> Zn <sub>0.2</sub> O <sub>5+δ</sub>   | 6.04×10 <sup>-6</sup> | 18.3×10 <sup>-6</sup> | 11.4×10 <sup>-6</sup> |
